# Supplementary material for: Biopotential of Underutilized Rosaceae Inflorescences: LC-DAD-MS Phytochemical Profiles Associated with Antioxidant, Antidiabetic, Anti-Inflammatory and Antiproliferative Activity In Vitro
Source: MDPI journal article supplement (doi:10.3390/plants11030271), 2022-01-20
Supplement: s1 [file s1]

**Supplementary Table S2.** Identification of phenolic compounds in *Rosaceae* inflorescences in negative ionization with LC-DAD-MS and MS<sup>2</sup>/MS<sup>3</sup>.

|    |                                     | [M-H] <sup>-</sup><br>( <i>m/z</i> ) | MS <sup>2</sup><br>( <i>m/z</i> ) | MS <sup>3</sup><br>( <i>m/z</i> ) |
|----|-------------------------------------|--------------------------------------|-----------------------------------|-----------------------------------|
| 1  | Gallic acid                         | 169                                  | 125                               |                                   |
| 2  | Caffeic acid                        | 179                                  | 135                               |                                   |
| 3  | Caffeic acid hexoside 1             | 341                                  | 179                               | 135                               |
| 4  | Caffeic acid hexoside 2             | 341                                  | 179                               | 135                               |
| 5  | Caffeic acid dihexoside             | 341                                  | 179                               | 135                               |
| 6  | 3-caffeoylquinic acid               | 353                                  | 191, 179, 135                     | 173, 127, 85                      |
| 7  | 4-caffeoylquinic acid               | 353                                  | 173, 179                          |                                   |
| 8  | 5-caffeoylquinic acid 1             | 353                                  | 191, 179                          | 127, 93, 85                       |
| 9  | 5-caffeoylquinic acid 2             | 353                                  | 191,179,135                       |                                   |
| 10 | di-caffeoylquinic acid 1            | 515                                  | 353                               | 191, 179                          |
| 11 | di-caffeoylquinic acid 2            | 515                                  | 353                               | 191, 179                          |
| 12 | di-caffeoylquinic acid 3            | 515                                  | 353                               | 191, 179                          |
| 13 | 3-feruloylquinic acid               | 367                                  | 193,134                           | 149                               |
| 14 | 5-feruloylquinic acid               | 367                                  | 191                               | 173, 127, 85                      |
| 15 | 3- <i>p</i> -coumaroylquinic acid   | 337                                  | 163                               |                                   |
| 16 | 4- <i>p</i> -coumaroylquinic acid   | 337                                  | 173, 163, 155, 137, 191           |                                   |
| 17 | 5- <i>p</i> -coumaroylquinic acid 1 | 337                                  | 191, 173, 163, 155                |                                   |
| 18 | 5- <i>p</i> -coumaroylquinic acid 2 | 337                                  | 191, 173, 163                     |                                   |
| 19 | <i>p</i> -coumaric acid hexoside 1  | 325                                  | 163                               |                                   |
| 20 | <i>p</i> -coumaric acid hexoside 2  | 325                                  | 163                               |                                   |
| 21 | Catechin                            | 289                                  | 245                               |                                   |
| 22 | Epicatechin                         | 289                                  | 245                               |                                   |

|    |                                   |     |          |          |
|----|-----------------------------------|-----|----------|----------|
| 23 | Eriodictyol hexoside 1            | 449 | 287      |          |
| 24 | Eriodictyol hexoside 2            | 449 | 287      |          |
| 25 | Naringenin hexoside               | 433 | 271      |          |
| 26 | Quercetin-glycoside               | 639 | 463      | 301      |
| 27 | Quercetin-3-rutinoside            | 609 | 301      |          |
| 28 | Quercetin-rhamnoside hexoside     | 609 | 301      |          |
| 29 | Quercetin-hexoside pentoside      | 595 | 433      | 301      |
| 30 | Quercetin-rhamnoside dihexoside 1 | 771 | 625      | 463, 301 |
| 31 | Quercetin-rhamnoside dihexoside 2 | 771 | 625      | 463, 301 |
| 32 | Quercetin-3-galactoside           | 463 | 301      |          |
| 33 | Quercetin-3-glucoside             | 463 | 301      |          |
| 34 | Quercetin-3-rhamnoside            | 447 | 301      |          |
| 35 | Quercetin-3-xyloside              | 433 | 301      |          |
| 36 | Quercetin-arabinofuranoside       | 433 | 301      |          |
| 37 | Quercetin-arabinopyranoside       | 433 | 301      |          |
| 38 | Quercetin-acetyl hexoside 1       | 505 | 463, 301 |          |
| 39 | Quercetin-acetyl hexoside 2       | 505 | 463, 301 |          |
| 40 | Kaempferol trihexoside            | 771 | 609      | 447, 285 |
| 41 | Kaempferol-3-rutinoside           | 593 | 285      |          |
| 42 | Kaempferol acetyl hexoside 1      | 489 | 285      |          |
| 43 | Kaempferol acetyl hexoside 2      | 489 | 285      |          |
| 44 | Kaempferol dihexoside             | 609 | 447      | 285      |
| 45 | Kaempferol pentoside 1            | 417 | 285      |          |
| 46 | Kaempferol pentoside 2            | 417 | 285      |          |
| 47 | Kaempferol rhamnoside             | 431 | 285      |          |
| 48 | Kaempferol hexoside 1             | 447 | 285      |          |
| 49 | Kaempferol hexoside 2             | 447 | 285      |          |

|    |                                |     |                         |     |
|----|--------------------------------|-----|-------------------------|-----|
| 50 | Kaempferol rhamnosyl hexoside  | 593 | 447                     | 285 |
| 51 | Isorhamnetin hexoside          | 477 | 315                     |     |
| 52 | Isorhamnetin dihexoside        | 639 | 477                     | 315 |
| 53 | Isorhamnetin acetyl hexoside 1 | 519 | 477                     | 315 |
| 54 | Isorhamnetin acetyl hexoside 2 | 519 | 477                     | 315 |
| 55 | Isorhamnetin-3-rutinoside      | 623 | 315                     |     |
| 56 | Myricetin-3-rutinoside         | 625 | 317                     |     |
| 57 | Laricitrin glucuronide         | 507 | 331                     |     |
| 58 | Syringetin hexoside 1          | 507 | 345                     |     |
| 59 | Syringetin hexoside 2          | 507 | 345                     |     |
| 60 | Syringetin acetyl hexoside 1   | 549 | 345                     |     |
| 61 | Syringetin acetyl hexoside 2   | 549 | 345                     |     |
| 62 | Apigenin hexoside              | 431 | 269                     |     |
| 63 | Phloretin xylosylglucoside     | 567 | 273                     |     |
| 64 | Phloridzin                     | 435 | 273                     |     |
| 65 | Trilobatin                     | 435 | 273                     |     |
| 66 | Procyanidin dimer 1            | 577 | 451, 425, 407, 289      |     |
| 67 | Procyanidin dimer 2            | 577 | 451, 425, 407, 289      |     |
| 68 | Procyanidin dimer 3            | 577 | 451, 425, 407, 289      |     |
| 69 | Procyanidin dimer 4            | 577 | 451, 425, 407, 289      |     |
| 70 | Procyanidin dimer 5            | 577 | 451, 425 407, 289       |     |
| 71 | Procyanidin dimer 6            | 577 | 451, 425, 407, 289      |     |
| 72 | Procyanidin trimer 1           | 865 | 577, 451, 425, 407, 289 |     |
| 73 | Procyanidin trimer 2           | 865 | 577, 451, 425, 407, 289 |     |
| 74 | Procyanidin trimer 3           | 865 | 577, 451, 425, 407, 289 |     |
| 75 | Procyanidin trimer 4           | 865 | 577, 451, 425, 407, 289 |     |
| 76 | Procyanidin trimer 5           | 865 | 577, 451, 425, 407, 289 |     |

|    |                      |      |                                     |  |
|----|----------------------|------|-------------------------------------|--|
| 77 | Procyanidin tetramer | 1153 | 1135, 1027, 983, 865, 863, 577, 575 |  |
|----|----------------------|------|-------------------------------------|--|
